# Supplementary material for: Probing Reversible Chemistry in Coenzyme B12-Dependent Ethanolamine Ammonia Lyase with Kinetic Isotope Effects
Source: PubMed Central journal article supplement — Chemistry. 2015 May 7;21(24):8826–31. doi: 10.1002/chem.201500958 (PMC4497352; doi:10.1002/chem.201500958), 2015-05-07
Supplement: chem0021-8826-sd1.pdf [file chem0021-8826-sd1.pdf]

# CHEMISTRY

## A **European** Journal

### Supporting Information

#### **Probing Reversible Chemistry in Coenzyme B<sub>12</sub>-Dependent Ethanolamine Ammonia Lyase with Kinetic Isotope Effects**

Alex R. Jones,<sup>\*[a]</sup> Julius Rentergent,<sup>[b]</sup> Nigel S. Scrutton,<sup>[b]</sup> and Sam Hay<sup>\*[b]</sup>

chem\_201500958\_sm\_miscellaneous\_information.pdf

Table S1. Tabulated proton inventory data from Figure 2.

| $n$  | $k_{\text{obs } 1} \text{ (s}^{-1}\text{)}$ | $k_{\text{obs } 2} \text{ (s}^{-1}\text{)}$ | $\text{KIE}_{\text{obs } 1}$ |
|------|---------------------------------------------|---------------------------------------------|------------------------------|
| 0    | $191.9 \pm 5.2$                             | $5.73 \pm 1.14$                             | $1.00 \pm 0.04$              |
| 0.25 | $144.4 \pm 6.5$                             | $4.71 \pm 1.08$                             | $1.33 \pm 0.07$              |
| 0.5  | $109.0 \pm 3.4$                             | $5.31 \pm 0.80$                             | $1.76 \pm 0.07$              |
| 0.75 | $77.0 \pm 4.5$                              | $6.11 \pm 1.14$                             | $2.49 \pm 0.16$              |
| 0.99 | $48.2 \pm 4.3$                              | $6.11 \pm 3.84$                             | $3.98 \pm 0.37$              |

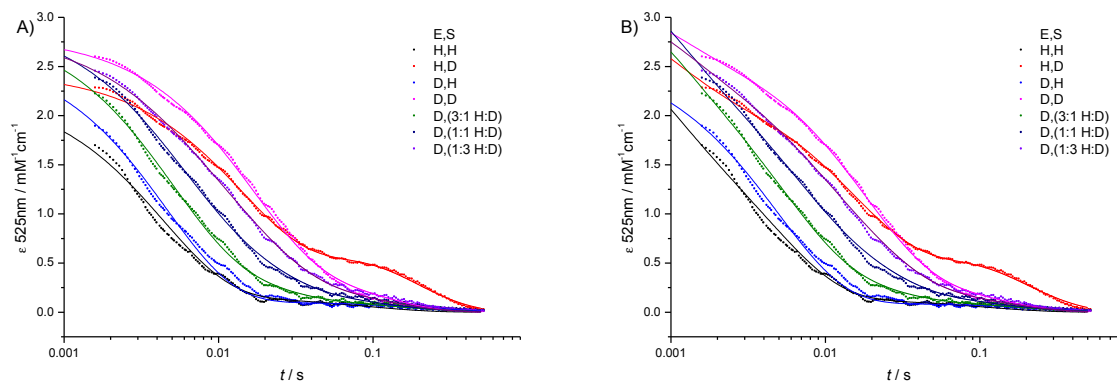

Figure S1. Comparison of the global fitting of the resampled data from Figures 1 and 2 to a 2-step (A) and 3-step (B; redrawn from Figure 3) mechanism. The fits are almost indistinguishable, and fitted parameters are given in Table S2.

Table S2. Fitted parameters determined by global fitting of the data in Figure 3.<sup>a</sup>

| Parameter                                                            | 2-step mechanism     |                | 3-step mechanism     |                |
|----------------------------------------------------------------------|----------------------|----------------|----------------------|----------------|
|                                                                      | Objective value 1.45 |                | Objective value 1.18 |                |
|                                                                      | value                | standard error | value                | standard error |
| $k_1$                                                                | -                    | -              | 562.219              | 61.176         |
| $k_{-1}$                                                             | -                    | -              | 582.262              | 82.748         |
| $k_{12}$                                                             | 208.821              | 1.448          | 497.245              | 67.708         |
| $k'_2$                                                               | 19.594               | 0.925          | 44.987               | 4.664          |
| $k_{-2}$                                                             | 16.871               | 1.677          | 24.265               | 2.601          |
| $k'_{-2}$                                                            | 11.203               | 0.284          | 11.011               | 0.331          |
| $k_3$                                                                | 12.183               | 0.414          | 10.276               | 0.350          |
| KIE <sub>2</sub>                                                     | 3.896                | 0.041          | 4.629                | 0.196          |
| KIE <sub>-2</sub>                                                    | 2.247                | 0.262          | 3.712                | 0.370          |
| KIE' <sub>-2</sub>                                                   | 39.447               | 6.139          | 37.452               | 5.202          |
| enzyme concentration uncertainty (fraction of initial concentration) |                      |                |                      |                |
| H,H                                                                  | 0.700                | 0.068          | 0.700                | 0.093          |
| H,D                                                                  | 0.786                | 0.001          | 1.087                | 0.108          |
| D,H                                                                  | 1.300                | 0.133          | 1.300                | 0.186          |
| D,D                                                                  | 1.040                | 0.035          | 1.300                | 0.132          |
| D,(3:1 H:D)                                                          | 0.851                | 0.021          | 1.066                | 0.120          |
| D,(1:1 H:D)                                                          | 0.843                | 0.002          | 1.139                | 0.120          |
| D,(1:3 H:D)                                                          | 0.925                | 0.011          | 1.241                | 0.126          |
| time uncertainty (ms)                                                |                      |                |                      |                |
| H,H                                                                  | 0.593                | 0.474          | 0.354                | 0.296          |
| H,D                                                                  | 1.600                | 0.139          | -0.459               | 0.296          |
| D,H                                                                  | -1.610               | 0.485          | -1.894               | 0.384          |
| D,D                                                                  | -0.995               | 0.631          | -0.947               | 0.343          |
| D,(3:1 H:D)                                                          | 1.083                | 0.148          | -0.172               | 0.254          |
| D,(1:1 H:D)                                                          | 1.600                | 0.054          | -0.155               | 0.248          |
| D,(1:3 H:D)                                                          | 0.780                | 0.151          | -0.753               | 0.277          |

<sup>a</sup> Selected parameters for the 3-step model are also presented in Table 3.
